# Supplementary material for: Association of Short-Term Particulate Matter Exposure among 5-Year Cancer Survivors with Incident Cardiovascular Disease: A Time-Stratified Case-Crossover Study
Source: MDPI journal article supplement (doi:10.3390/ijerph18157996), 2021-07-28
Supplement: s1 [file s1]

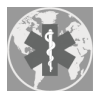

Article

# Association of Short-Term Particulate Matter Exposure among 5-Year Cancer Survivors with Incident Cardiovascular Disease: A Time-Stratified Case-Crossover Study

Seulgie Choi <sup>1</sup>, Kye Hyung Kim <sup>2</sup>, Daein Choi <sup>3</sup>, Seongsong Jeong <sup>1</sup>, Kyuwoong Kim <sup>4</sup>, Jooyoung Chang <sup>1</sup>, Sung Min Kim <sup>1</sup>, Seong Rae Kim <sup>5</sup>, Yoosun Cho <sup>6</sup>, Gyeongsil Lee <sup>2</sup>, Joung Sik Son <sup>7</sup> and Sang Min Park <sup>2,8,\*</sup>

**Citation:** Choi, S.; Kim, K.H.; Choi, D.; Jeong, S.; Kim, K.; Chang, J.; Kim, S.M.; Kim, S.R.; Cho, Y.; Lee, G.; et al. Association of Short-Term Particulate Matter Exposure among 5-Year Cancer Survivors with Incident Cardiovascular Disease: A Time-Stratified Case-Crossover Study. *Int. J. Environ. Res. Public Health* **2021**, *18*, 7996. <https://doi.org/10.3390/ijerph18157996>

Academic Editor: Paul B. Tchounwou

Received: 17 June 2021

Accepted: 27 July 2021

Published: 28 July 2021

**Publisher's Note:** MDPI stays neutral with regard to jurisdictional claims in published maps and institutional affiliations.

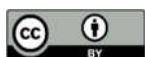

**Copyright:** © 2021 by the authors. Licensee MDPI, Basel, Switzerland. This article is an open access article distributed under the terms and conditions of the Creative Commons Attribution (CC BY) license (<http://creativecommons.org/licenses/by/4.0/>).

<sup>1</sup> Department of Biomedical Sciences, Graduate School, Seoul National University, Seoul 03080, Korea; seulgie@gmail.com (S.C.); seongsongjeong@gmail.com (S.J.); joomyjoo@gmail.com (J.C.); ksm9904@naver.com (S.M.K.)

<sup>2</sup> Department of Family Medicine, Seoul National University Hospital, Seoul 03080, Korea; truewhat@gmail.com (K.H.K.); gerspino1\_gs@gmail.com (G.L.)

<sup>3</sup> Department of Internal Medicine, Mount Sinai Beth Israel, Icahn School of Medicine at Mount Sinai, New York, NY 10029, USA; daeinchoi.md@gmail.com

<sup>4</sup> National Cancer Control Institute, National Cancer Center, Goyang 10408, Korea; kwkim238@gmail.com

<sup>5</sup> College of Medicine, Seoul National University Hospital, Seoul 03080, Korea; sungkim20@snu.ac.kr

<sup>6</sup> Total Healthcare Center, Kangbuk Samsung Hospital, School of Medicine, Sungkyunkwan University, Seoul 06351, Korea; misslonghorn46@gmail.com

<sup>7</sup> Department of Family Medicine, Korea University Guro Hospital, Seoul 08308, Korea; medical114@naver.com

<sup>8</sup> Department of Biomedical Sciences, College of Medicine, Seoul National University, Seoul 03080, Korea

\* Correspondence: smpark.snuh@gmail.com; Tel.: +82-2-2072-3331

**Table S1.** Association of short-term exposure to PM10 with cardiovascular disease events among 5-year cancer survivors.

|                        | PM10, quartiles          |                  |                  |                           |                    |
|------------------------|--------------------------|------------------|------------------|---------------------------|--------------------|
|                        | 1 <sup>st</sup> (lowest) | 2 <sup>nd</sup>  | 3 <sup>rd</sup>  | 4 <sup>th</sup> (highest) | <i>p</i> for trend |
| Lag 0                  |                          |                  |                  |                           |                    |
| Range, µg/m³           | 0.0-28.2                 | 28.3-40.0        | 40.0-55.5        | 55.5-795.0                |                    |
| Number of participants | 25,392                   | 25,597           | 25,229           | 25,358                    |                    |
| Events (%)             | 5,611 (22.1)             | 5,612 (21.9)     | 5,815 (23.1)     | 5,826 (23.0)              |                    |
| aOR (95% CI)           | 1.00 (reference)         | 0.99 (0.94-1.04) | 1.04 (0.99-1.09) | 1.04 (0.97-1.10)          | 0.139              |
| Lag 1                  |                          |                  |                  |                           |                    |
| Range, µg/m³           | 0.0-28.0                 | 28.0-40.0        | 40.0-55.5        | 55.5-629.0                |                    |
| Number of participants | 25,519                   | 25,687           | 24,856           | 25,427                    |                    |
| Events (%)             | 5,508 (21.6)             | 5,704 (22.2)     | 5,681 (22.9)     | 5,934 (23.3)              |                    |
| aOR (95% CI)           | 1.00 (reference)         | 1.05 (1.00-1.11) | 1.08 (1.03-1.14) | 1.14 (1.07-1.20)          | <0.001             |
| Lag 2                  |                          |                  |                  |                           |                    |
| Range, µg/m³           | 1.0-28.0                 | 28.0-40.0        | 40.0-56.0        | 56.0-584.0                |                    |
| Number of participants | 25,361                   | 25,506           | 24,999           | 25,576                    |                    |
| Events (%)             | 5,574 (22.0)             | 5,652 (22.2)     | 5,556 (22.2)     | 6,036 (23.6)              |                    |
| aOR (95% CI)           | 1.00 (reference)         | 1.01 (0.96-1.07) | 1.02 (0.97-1.08) | 1.11 (1.05-1.17)          | <0.001             |
| Lag 3                  |                          |                  |                  |                           |                    |
| Range, µg/m³           | 0.0-28.5                 | 28.5-40.2        | 40.2-56.0        | 56.0-629.0                |                    |
| Number of participants | 25,318                   | 25,394           | 25,627           | 25,084                    |                    |
| Events (%)             | 5,608 (22.2)             | 5,634 (22.2)     | 5,708 (22.3)     | 5,863 (23.4)              |                    |
| aOR (95% CI)           | 1.00 (reference)         | 1.01 (0.96-1.06) | 1.02 (0.95-1.07) | 1.09 (1.03-1.15)          | 0.006              |
| Lag 0-3 (average)      |                          |                  |                  |                           |                    |
| Range, µg/m³           | 5.0-31.1                 | 31.1-42.0        | 42.0-54.5        | 54.5-298.8                |                    |
| Number of participants | 25,375                   | 25,319           | 25,324           | 25,405                    |                    |
| Events (%)             | 5,550 (21.9)             | 5,604 (22.1)     | 5,682 (22.4)     | 5,977 (23.5)              |                    |
| aOR (95% CI)           | 1.00 (reference)         | 1.00 (0.95-1.06) | 1.06 (1.00-1.12) | 1.13 (1.06-1.21)          | <0.001             |

Adjusted odds ratios calculated by conditional logistic regression after adjustment for mean daily temperature (categorical, 1<sup>st</sup>, 2<sup>nd</sup>, 3<sup>rd</sup>, and 4<sup>th</sup> quartiles). Acronyms: PM10, particulate matter 10; aOR, adjusted odds ratio; CI, confidence interval.

**Table S2.** Association of short-term exposure to PM2.5 with cardiovascular disease events among 5-year cancer survivors.

|                        | PM2.5, quartiles         |                  |                  |                           |                    |
|------------------------|--------------------------|------------------|------------------|---------------------------|--------------------|
|                        | 1 <sup>st</sup> (lowest) | 2 <sup>nd</sup>  | 3 <sup>rd</sup>  | 4 <sup>th</sup> (highest) | <i>p</i> for trend |
| Lag 0                  |                          |                  |                  |                           |                    |
| Range, µg/m³           | 0.0-15.0                 | 15.0-22.1        | 22.1-32.0        | 32.0-135.0                |                    |
| Number of participants | 25,394                   | 25,394           | 25,712           | 25,076                    |                    |
| Events (%)             | 5,530 (21.8)             | 5,801 (22.8)     | 5,790 (22.5)     | 5,743 (22.9)              |                    |
| aOR (95% CI)           | 1.00 (reference)         | 1.07 (1.02-1.13) | 1.02 (0.97-1.08) | 1.07 (0.98-1.11)          | 0.409              |
| Lag 1                  |                          |                  |                  |                           |                    |
| Range, µg/m³           | 0.0-15.0                 | 15.0-22.0        | 22.0-32.0        | 32.0-136.0                |                    |
| Number of participants | 25,357                   | 25,497           | 25,443           | 25,192                    |                    |
| Events (%)             | 5,357 (25.0)             | 5,794 (22.7)     | 5,799 (22.8)     | 5,851 (23.2)              |                    |
| aOR (95% CI)           | 1.00 (reference)         | 1.06 (1.03-1.12) | 1.09 (1.03-1.14) | 1.12 (1.06-1.19)          | <0.001             |
| Lag 2                  |                          |                  |                  |                           |                    |
| Range, µg/m³           | 0.0-15.0                 | 15.0-22.4        | 22.4-32.3        | 32.3-144.0                |                    |
| Number of participants | 25,234                   | 25,487           | 25,361           | 25,360                    |                    |
| Events (%)             | 5,515 (21.9)             | 5,675 (22.3)     | 5,778 (22.8)     | 5,850 (23.1)              |                    |
| aOR (95% CI)           | 1.00 (reference)         | 1.03 (0.98-1.08) | 1.07 (1.01-1.13) | 1.09 (1.03-1.16)          | 0.001              |
| Lag 3                  |                          |                  |                  |                           |                    |
| Range, µg/m³           | 0.0-15.0                 | 15.0-22.5        | 22.5-32.5        | 32.5-136.0                |                    |
| Number of participants | 24,815                   | 25,991           | 25,183           | 25,434                    |                    |
| Events (%)             | 5,442 (21.9)             | 5,799 (22.3)     | 5,760 (22.9)     | 5,812 (22.9)              |                    |
| aOR (95% CI)           | 1.00 (reference)         | 1.02 (0.97-1.07) | 1.04 (0.98-1.09) | 1.07 (1.01-1.13)          | 0.029              |
| Lag 0-3 (average)      |                          |                  |                  |                           |                    |
| Range, µg/m³           | 0.0-16.9                 | 16.9-23.5        | 23.5-31.3        | 31.3-113.3                |                    |
| Number of participants | 25,355                   | 25,197           | 25,346           | 25,525                    |                    |
| Events (%)             | 5,444 (21.5)             | 5,733 (22.8)     | 5,729 (22.6)     | 5,907 (23.1)              |                    |
| aOR (95% CI)           | 1.00 (reference)         | 1.06 (1.00-1.12) | 1.06 (1.00-1.12) | 1.11 (1.05-1.18)          | 0.002              |

Adjusted odds ratios calculated by conditional logistic regression after adjustment for mean daily temperature (categorical, 1<sup>st</sup>, 2<sup>nd</sup>, 3<sup>rd</sup>, and 4<sup>th</sup> quartiles). Acronyms: PM2.5, particulate matter 2.5; aOR, adjusted odds ratio; CI, confidence interval.

**Table 3.** Association of short-term exposure to PM2.5-10 with cardiovascular disease events among 5-year cancer survivors.

| PM2.5-10, quartiles    |                          |                  |                  |                           |                    |
|------------------------|--------------------------|------------------|------------------|---------------------------|--------------------|
|                        | 1 <sup>st</sup> (lowest) | 2 <sup>nd</sup>  | 3 <sup>rd</sup>  | 4 <sup>th</sup> (highest) | <i>p</i> for trend |
| Lag 0                  |                          |                  |                  |                           |                    |
| Range, µg/m³           | 0.0-11.1                 | 11.0-16.5        | 16.5-24.0        | 24.0-716.1                |                    |
| Number of participants | 26,092                   | 24,696           | 25,983           | 24,805                    |                    |
| Events (%)             | 5,715 (21.9)             | 5,568 (22.6)     | 5,894 (22.7)     | 5,687 (22.9)              |                    |
| aOR (95% CI)           | 1.00 (reference)         | 1.04 (0.98-1.09) | 1.04 (0.98-1.10) | 1.05 (1.00-1.12)          | 0.068              |
| Lag 1                  |                          |                  |                  |                           |                    |
| Range, µg/m³           | 0.0-11.0                 | 11.0-16.0        | 16.0-24.0        | 24.0-586.0                |                    |
| Number of participants | 26,632                   | 24,241           | 25,074           | 25,542                    |                    |
| Events (%)             | 5,836 (21.9)             | 5,431 (22.4)     | 5,608 (22.4)     | 5,952 (23.2)              |                    |
| aOR (95% CI)           | 1.00 (reference)         | 1.04 (0.99-1.10) | 1.03 (0.98-1.09) | 1.11 (1.04-1.18)          | 0.002              |
| Lag 2                  |                          |                  |                  |                           |                    |
| Range, µg/m³           | 0.0-11.0                 | 11.0-16.0        | 16.0-24.0        | 24.0-545.0                |                    |
| Number of participants | 26,579                   | 24,141           | 24,902           | 25,820                    |                    |
| Events (%)             | 5,867 (22.1)             | 5,394 (22.3)     | 5,586 (22.4)     | 5,971 (23.1)              |                    |
| aOR (95% CI)           | 1.00 (reference)         | 1.03 (0.97-1.08) | 1.03 (0.97-1.09) | 1.08 (1.02-1.14)          | 0.022              |
| Lag 3                  |                          |                  |                  |                           |                    |
| Range, µg/m³           | 0.0-11.0                 | 11.0-16.0        | 16.0-24.0        | 24.0-586.0                |                    |
| Number of participants | 26,397                   | 24,314           | 25,725           | 24,987                    |                    |
| Events (%)             | 5,880 (22.3)             | 5,369 (22.1)     | 5,735 (22.3)     | 5,829 (23.3)              |                    |

|                          |                  |                  |                  |                  |       |
|--------------------------|------------------|------------------|------------------|------------------|-------|
| aOR (95% CI)             | 1.00 (reference) | 0.99 (0.94-1.04) | 1.01 (0.95-1.06) | 1.09 (1.03-1.15) | 0.011 |
| Lag 0-3 (average)        |                  |                  |                  |                  |       |
| Range, µg/m <sup>3</sup> | 0.0-12.0         | 12.0-17.0        | 17.0-23.8        | 23.8-254.8       |       |
| Number of participants   | 25,594           | 24,902           | 25,571           | 25,356           |       |
| Events (%)               | 5,652 (22.1)     | 5,586 (22.4)     | 5,658 (22.1)     | 5,917 (23.3)     |       |
| aOR (95% CI)             | 1.00 (reference) | 1.02 (0.96-1.08) | 1.01 (0.95-1.08) | 1.11 (1.03-1.19) | 0.007 |

Adjusted odds ratios calculated by conditional logistic regression after adjustment for mean daily temperature (categorical, 1<sup>st</sup>, 2<sup>nd</sup>, 3<sup>rd</sup>, and 4<sup>th</sup> quartiles). Acronyms: PM2.5, particulate matter between 2.5-10; aOR, adjusted odds ratio; CI, confidence interval.

**Table S4.** Association of short-term PM with coronary heart disease or stroke among 5-year cancer survivors.

| Adjusted odds ratio, 95% confidence interval |                          |                  |                  |                           |                    |
|----------------------------------------------|--------------------------|------------------|------------------|---------------------------|--------------------|
| PM, quartiles                                |                          |                  |                  |                           |                    |
|                                              | 1 <sup>st</sup> (lowest) | 2 <sup>nd</sup>  | 3 <sup>rd</sup>  | 4 <sup>th</sup> (highest) | <i>p</i> for trend |
| Coronary heart disease                       |                          |                  |                  |                           |                    |
| PM10                                         |                          |                  |                  |                           |                    |
| Lag 0                                        | 1.00 (reference)         | 0.97 (0.89-1.06) | 1.00 (0.91-1.09) | 1.01 (0.92-1.11)          | 0.711              |
| Lag 1                                        | 1.00 (reference)         | 1.04 (0.95-1.13) | 1.03 (0.94-1.12) | 1.01 (0.92-1.11)          | 0.913              |
| Lag 2                                        | 1.00 (reference)         | 1.01 (0.92-1.09) | 0.98 (0.90-1.07) | 0.97 (0.89-1.07)          | 0.489              |
| Lag 3                                        | 1.00 (reference)         | 0.98 (0.90-1.07) | 0.98 (0.90-1.07) | 1.01 (0.92-1.11)          | 0.805              |
| Lag 0-3                                      | 1.00 (reference)         | 0.98 (0.90-1.07) | 0.96 (0.87-1.06) | 1.01 (0.91-1.12)          | 0.891              |
| PM2.5                                        |                          |                  |                  |                           |                    |
| Lag 0                                        | 1.00 (reference)         | 1.04 (0.95-1.13) | 0.98 (0.90-1.07) | 1.06 (0.97-1.17)          | 0.435              |
| Lag 1                                        | 1.00 (reference)         | 1.08 (0.99-1.17) | 1.04 (0.95-1.14) | 1.05 (0.96-1.15)          | 0.508              |
| Lag 2                                        | 1.00 (reference)         | 1.05 (0.97-1.14) | 1.03 (0.94-1.12) | 1.03 (0.94-1.12)          | 0.748              |
| Lag 3                                        | 1.00 (reference)         | 0.99 (0.91-1.08) | 1.00 (0.92-1.09) | 1.07 (0.98-1.17)          | 0.110              |
| Lag 0-3                                      | 1.00 (reference)         | 1.09 (1.00-1.19) | 1.07 (0.98-1.17) | 1.08 (0.98-1.20)          | 0.228              |
| PM2.5-10                                     |                          |                  |                  |                           |                    |
| Lag 0                                        | 1.00 (reference)         | 1.05 (0.96-1.14) | 0.98 (0.90-1.08) | 1.00 (0.90-1.11)          | 0.694              |
| Lag 1                                        | 1.00 (reference)         | 1.00 (0.92-1.09) | 0.99 (0.91-1.09) | 0.98 (0.89-1.08)          | 0.690              |
| Lag 2                                        | 1.00 (reference)         | 1.06 (0.98-1.16) | 1.00 (0.91-1.09) | 0.94 (0.85-1.04)          | 0.131              |
| Lag 3                                        | 1.00 (reference)         | 1.02 (0.94-1.11) | 0.99 (0.91-1.09) | 0.99 (0.89-1.09)          | 0.684              |
| Lag 0-3                                      | 1.00 (reference)         | 0.97 (0.89-1.07) | 0.91 (0.82-1.00) | 0.91 (0.82-1.02)          | 0.073              |
| Stroke                                       |                          |                  |                  |                           |                    |
| PM10                                         |                          |                  |                  |                           |                    |
| Lag 0                                        | 1.00 (reference)         | 1.00 (0.94-1.07) | 1.07 (1.00-1.14) | 1.04 (0.97-1.13)          | 0.111              |
| Lag 1                                        | 1.00 (reference)         | 1.06 (0.99-1.13) | 1.09 (1.02-1.17) | 1.19 (1.10-1.28)          | <0.001             |
| Lag 2                                        | 1.00 (reference)         | 1.01 (0.95-1.08) | 1.03 (0.96-1.11) | 1.18 (1.10-1.27)          | <0.001             |
| Lag 3                                        | 1.00 (reference)         | 1.01 (0.95-1.08) | 1.03 (0.96-1.10) | 1.13 (1.05-1.22)          | <0.001             |
| Lag 0-3                                      | 1.00 (reference)         | 1.01 (0.95-1.08) | 1.11 (1.03-1.20) | 1.21 (1.12-1.31)          | <0.001             |
| PM2.5                                        |                          |                  |                  |                           |                    |

|          |                  |                  |                  |                  |        |
|----------|------------------|------------------|------------------|------------------|--------|
| Lag 0    | 1.00 (reference) | 1.09 (1.02-1.17) | 1.04 (0.98-1.12) | 1.04 (0.96-1.12) | 0.667  |
| Lag 1    | 1.00 (reference) | 1.07 (1.00-1.14) | 1.10 (1.03-1.18) | 1.15 (1.07-1.23) | <0.001 |
| Lag 2    | 1.00 (reference) | 1.01 (0.95-1.07) | 1.08 (1.01-1.16) | 1.11 (1.03-1.19) | <0.001 |
| Lag 3    | 1.00 (reference) | 1.02 (0.96-1.09) | 1.06 (0.99-1.13) | 1.05 (0.98-1.13) | 0.099  |
| Lag 0-3  | 1.00 (reference) | 1.05 (0.98-1.12) | 1.04 (0.97-1.12) | 1.14 (1.06-1.23) | 0.002  |
| PM2.5-10 |                  |                  |                  |                  |        |
| Lag 0    | 1.00 (reference) | 1.03 (0.96-1.10) | 1.08 (1.00-1.16) | 1.10 (1.02-1.19) | 0.008  |
| Lag 1    | 1.00 (reference) | 1.07 (1.00-1.15) | 1.07 (0.99-1.15) | 1.20 (1.12-1.30) | <0.001 |
| Lag 2    | 1.00 (reference) | 1.00 (0.94-1.07) | 1.04 (0.97-1.12) | 1.17 (1.08-1.26) | <0.001 |
| Lag 3    | 1.00 (reference) | 0.97 (0.91-1.04) | 1.02 (0.95-1.09) | 1.16 (1.07-1.25) | <0.001 |
| Lag 0-3  | 1.00 (reference) | 1.05 (0.97-1.12) | 1.08 (1.00-1.17) | 1.24 (1.14-1.36) | <0.001 |

Adjusted odds ratios calculated by conditional logistic regression after adjustment for mean daily temperature (categorical, 1<sup>st</sup>, 2<sup>nd</sup>, 3<sup>rd</sup>, and 4<sup>th</sup> quartiles). Acronyms: PM, particulate matter.
